# Supplementary material
Source: PubMed Central journal article supplement (PMC9373949)
Supplement: glab379_suppl_supplementary_material.pdf [file glab379_suppl_supplementary_material.pdf]

## Effects of Vitamin D in Physical Function: Results from the STURDY Trial

### Online Supplement

|                                                                                                                                                                                                           | <b>Page</b> |
|-----------------------------------------------------------------------------------------------------------------------------------------------------------------------------------------------------------|-------------|
| Members of the STURDY Collaborative Research Group                                                                                                                                                        | 2           |
| eTable 1. Characteristics of randomized participants at enrollment (full version).                                                                                                                        | 3           |
| eTable 2. Serum 25(OH)D level (ng/mL) over time by treatment group and use of a personal vitamin D supplement at enrollment.                                                                              | 6           |
| eTable 3. Change in 6-minute walk and grip strength since randomization in the primary analysis population.                                                                                               | 7           |
| eTable 4. Sensitivity analysis: Change in functional outcome measures since randomization in those randomized to 1000 IU/d versus those randomized to 200 IU/d.                                           | 9           |
| eTable 5. Exploratory analysis: Change in functional outcome measures since randomization in the 4-group analysis population (those randomized before any adaptation of the randomization probabilities). | 12          |

**Members of the STURDY Collaborative Research Group (\*denotes manuscript author):**

**Welch Center for Prevention, Epidemiology and Clinical Research:** \*Lawrence J. Appel, MD, MPH (chair); Nicole Cronin, MA; \*Stephen P. Juraschek, MD, PhD; Scott McClure, MS; \*Christine M. Mitchell, ScM; Timothy B. Plante, MD, MHS.

**Center on Aging and Health:** \*Rita R. Kalyani, MD, MHS; David L. Roth, PhD; \*Jennifer A. Schrack, PhD; \*Sarah L. Szanton, PhD; Jacek K. Urbanek, PhD; Jeremy Walston, MD; \*Amal A. Wanigatunga, PhD, MPH.

**STURDY Data Coordinating Center:** Sheriza N. Baksh, PhD; \*Amanda L. Blackford, ScM; Shumon Chattopadhyay, MSE; Lea T. Drye, PhD; John Dodge; Cathleen Ewing; Sana Haider, BS; Stephanie C. Holland, BS; Rosetta Jackson; Andrea Lears, BS; Curtis Meinert, PhD; David M. Shade, JD; Michael Smith, BS; \*Alice L. Sternberg, ScM; James Tonascia, PhD; Mark L. Van Natta, MHS; Annette Wagoner.

**George W. Comstock Center for Public Health Research and Prevention, Johns Hopkins University:** \*Erin D. Michos, MD, MHS (Site PI); J. Denise Bennett; Pamela Bowers; Josef Coresh, MD, PhD; Patricia Crowley, MS; Tammy Crunkleton; Briana Dick, BA; Rebecca Evans, RN; Mary Godwin; Lynne Hammann; Deborah Hawks; Karen Horning; Erika Hull; Brandi Mills; Melissa Minotti, MPH; Leann Raley; Amanda Reed, MS; Rhonda Reeder, RN; Cassie Reid; Melissa Shuda; Adria Spikes; Rhonda Stouffer; Kelly Weicht.

**ProHealth Clinical Research Unit, Johns Hopkins University:** Edgar R. Miller III, MD, PhD (Site PI); Caroline Abbas; Bernellyn Carey, BS; Jeanne Charleston, RN; Syree Davis; Naomi DeRoche-Brown; Debra Gayles; Sherlina Holland, MPH; Ina Glenn-Smith; Duane Johnson; Mia Johnson; Eva Keyes; Kristen McArthur; Danielle Santiago; Chanchai Sapun; Valerie Sneed; Lee Swartz, MBA; Letitia Thomas.

**Clinical Core Research Laboratory, University of Maryland School of Medicine:** Robert H. Christenson, PhD; Show-Hong Duh, PhD; Heather Rebeck.

**Data and Safety Monitoring Board (DSMB):** Clifford Rosen, MD (chair, Maine Medical Center Research Institute); Thomas Cook, PhD (University of Wisconsin); Pamela Duncan, PhD (Wake Forest Baptist Health); Karen E. Hansen, MD, MS (2016-2019, University of Wisconsin); Anne Kenny, MD (2014-2016, University of Connecticut); Sue Shapses, PhD, RD (Rutgers University).

**National Institute on Aging (NIA):** Judy Hannah, PhD; Sergei Romashkan, MD.

**Office of Dietary Supplements (ODS):** Cindy D. Davis, PhD; Christopher T. Sempos, PhD.

**Consultants:** \*Jack M. Guralnik, MD, PhD (University of Maryland School of Medicine); J.C. Gallagher, MD (Creighton University School of Medicine).

**eTable 1. Characteristics of randomized participants at enrollment (full version).**

|                                                   | Primary Analysis Population<br>(N=688)            |                      | Those<br>randomized<br>to 1000<br>IU/d<br>(N=212) | 4-Dose Analysis Population <sup>b</sup><br>(N=406) |                     |                     |                      | All<br>(N=688)     |
|---------------------------------------------------|---------------------------------------------------|----------------------|---------------------------------------------------|----------------------------------------------------|---------------------|---------------------|----------------------|--------------------|
|                                                   | Pooled<br>Higher<br>Doses <sup>a</sup><br>(N=349) | 200 IU/d<br>(N=339)  |                                                   | 1000 IU/d<br>(N=67)                                | 2000 IU/d<br>(N=67) | 4000 IU/d<br>(N=67) | 200 IU/d<br>(N=205)  |                    |
| Age (years), mean ± SD                            | 77.2 ± 5.4                                        | 77.2 ± 5.4           | 76.5 ± 5.3                                        | 76.4 ± 4.4                                         | 77.3 ± 4.6          | 79.1 ± 5.9          | 77.8 ± 5.6           | 77.2 ± 5.4         |
| Male, no. (%)                                     | 190 (54.4%)                                       | 198 (58.4%)          | 110 (51.9%)                                       | 38 (56.7%)                                         | 38 (56.7%)          | 40 (59.7%)          | 117 (57.1%)          | 388 (56.4%)        |
| Race, no. (%) <sup>c</sup>                        |                                                   |                      |                                                   |                                                    |                     |                     |                      |                    |
| White                                             | 267 (77.2%)                                       | 276 (82.4%)          | 159 (75.7%)                                       | 49 (73.1%)                                         | 50 (75.8%)          | 56 (83.6%)          | 171 (83.4%)          | 543 (79.7%)        |
| Black                                             | 69 (19.9%)                                        | 55 (16.4%)           | 44 (21.0%)                                        | 13 (19.4%)                                         | 15 (22.7%)          | 10 (14.9%)          | 32 (15.6%)           | 124 (18.2%)        |
| Other                                             | 16 (4.6%)                                         | 7 (2.1%)             | 12 (5.7%)                                         | 5 (7.5%)                                           | 2 (3.0%)            | 1 (1.5%)            | 4 (2.0%)             | 23 (3.4%)          |
| No. missing                                       | 3                                                 | 4                    | 2                                                 | 0                                                  | 1                   | 0                   | 0                    | 7                  |
| Hispanic, Latino or Spanish<br>ethnicity, no. (%) | 5 (1.4%)                                          | 3 (0.9%)             | 3 (1.4%)                                          | 2 (3.0%)                                           | 1 (1.5%)            | 1 (1.5%)            | 2 (1.0%)             | 8 (1.2%)           |
| No. missing                                       | 1                                                 | 3                    | 1                                                 | 0                                                  | 0                   | 0                   | 2                    | 4                  |
| Serum 25(OH)D (ng/mL)                             |                                                   |                      |                                                   |                                                    |                     |                     |                      |                    |
| 10-19, no. (%)                                    | 100 (28.7%)                                       | 100 (29.5%)          | 53 (25.0%)                                        | 15 (22.4%)                                         | 25 (37.3%)          | 22 (32.8%)          | 69 (33.7%)           | 200 (29.1%)        |
| 20-29, no. (%)                                    | 249 (71.3%)                                       | 239 (70.5%)          | 159 (75.0%)                                       | 52 (77.6%)                                         | 42 (62.7%)          | 45 (67.2%)          | 136 (66.3%)          | 488 (70.9%)        |
| Mean ± SD                                         | 22.1 ± 4.9                                        | 22.1 ± 5.3           | 22.6 ± 4.7                                        | 22.1 ± 4.1                                         | 21.0 ± 5.3          | 21.2 ± 4.9          | 21.5 ± 5.3           | 22.1 ± 5.1         |
| Median (Q25, Q75)                                 | 23 (19, 26)                                       | 23 (18, 27)          | 23 (19.5, 26)                                     | 22 (20, 25)                                        | 22 (17, 25)         | 22 (17, 25)         | 23 (17, 26)          | 23 (19, 26)        |
| Taking a vitamin D<br>supplement, no. (%)         | 132 (37.8%)                                       | 124 (36.6%)          | 82 (38.7%)                                        | 27 (40.3%)                                         | 26 (38.8%)          | 21 (31.3%)          | 76 (37.1%)           | 256 (37.2%)        |
| Median (Q25, Q75) daily<br>dose (IU)              | 700<br>(400, 1000)                                | 800<br>(414.5, 1000) | 650<br>(400, 1000)                                | 800<br>(400, 900)                                  | 800<br>(500, 1000)  | 571<br>(400, 800)   | 800<br>(414.5, 1000) | 700<br>(400, 1000) |
| Low physical activity <sup>d</sup> , no. (%)      | 43 (12.4%)                                        | 47 (13.9%)           | 27 (12.9%)                                        | 7 (10.6%)                                          | 7 (10.4%)           | 9 (13.4%)           | 39 (19.0%)           | 90 (13.1%)         |
| No. missing                                       | 2                                                 | 0                    | 2                                                 | 1                                                  | 0                   | 0                   | 0                    | 2                  |
| SPPB total score <sup>e</sup>                     |                                                   |                      |                                                   |                                                    |                     |                     |                      |                    |
| 0 to 8, no. (%)                                   | 138 (39.5%)                                       | 115 (33.9%)          | 80 (37.7%)                                        | 33 (49.3%)                                         | 29 (43.3%)          | 29 (43.3%)          | 72 (35.1%)           | 253 (36.8%)        |
| 9-12, no. (%)                                     | 211 (60.5%)                                       | 224 (66.1%)          | 132 (62.3%)                                       | 34 (50.7%)                                         | 38 (56.7%)          | 38 (56.7%)          | 133 (64.9%)          | 435 (63.2%)        |
| Mean ± SD                                         | 8.6 ± 2.5                                         | 8.9 ± 2.3            | 8.8 ± 2.6                                         | 8.4 ± 2.5                                          | 8.2 ± 2.4           | 8.5 ± 2.5           | 8.7 ± 2.3            | 8.7 ± 2.4          |

|                                                   | Primary Analysis Population<br>(N=688)            |                     | Those<br>randomized<br>to 1000<br>IU/d<br>(N=212) | 4-Dose Analysis Population <sup>b</sup><br>(N=406) |                     |                     |                     | All<br>(N=688) |
|---------------------------------------------------|---------------------------------------------------|---------------------|---------------------------------------------------|----------------------------------------------------|---------------------|---------------------|---------------------|----------------|
|                                                   | Pooled<br>Higher<br>Doses <sup>a</sup><br>(N=349) | 200 IU/d<br>(N=339) |                                                   | 1000 IU/d<br>(N=67)                                | 2000 IU/d<br>(N=67) | 4000 IU/d<br>(N=67) | 200 IU/d<br>(N=205) |                |
| SPPB total balance stand <sup>e</sup><br>time (s) |                                                   |                     |                                                   |                                                    |                     |                     |                     |                |
| Mean ± SD                                         | 26.6 ± 6.2                                        | 26.9 ± 6.3          | 26.7 ± 6.6                                        | 26.9 ± 6.4                                         | 26.1 ± 6.0          | 27.0 ± 5.2          | 26.4 ± 6.8          | 26.8 ± 6.2     |
| No. missing                                       | 0                                                 | 1                   | 0                                                 | 0                                                  | 0                   | 0                   | 1                   | 1              |
| SPPB gait speed (m/s) <sup>e</sup>                |                                                   |                     |                                                   |                                                    |                     |                     |                     |                |
| < 0.6 m/s                                         | 46 (13.3%)                                        | 35 (10.4%)          | 24 (11.4%)                                        | 10 (15.2%)                                         | 11 (16.4%)          | 11 (16.4%)          | 21 (10.3%)          | 81 (11.8%)     |
| ≥ 0.6 m/s                                         | 301 (86.7%)                                       | 303 (89.6%)         | 186 (88.6%)                                       | 56 (84.8%)                                         | 56 (83.6%)          | 56 (83.6%)          | 183 (89.7%)         | 604 (88.2%)    |
| Mean ± SD                                         | 0.84 ± 0.23                                       | 0.89 ± 0.23         | 0.85 ± 0.23                                       | 0.81 ± 0.24                                        | 0.80 ± 0.23         | 0.84 ± 0.23         | 0.88 ± 0.21         | 0.86 ± 0.24    |
| No. missing                                       | 2                                                 | 1                   | 2                                                 | 1                                                  | 0                   | 0                   | 1                   | 3              |
| SPPB chair stand time (s) <sup>e</sup>            |                                                   |                     |                                                   |                                                    |                     |                     |                     |                |
| Mean ± SD                                         | 15.7 ± 6.4                                        | 15.2 ± 5.0          | 14.7 ± 4.4                                        | 15.8 ± 4.2                                         | 17.2 ± 6.4          | 17.3 ± 10.5         | 15.7 ± 5.2          | 15.4 ± 5.7     |
| No. missing                                       | 39                                                | 31                  | 23                                                | 7                                                  | 7                   | 9                   | 17                  | 70             |
| TUG time (s) <sup>f</sup>                         |                                                   |                     |                                                   |                                                    |                     |                     |                     |                |
| < 12 s                                            | 228 (66.1%)                                       | 251 (74.9%)         | 140 (67.0%)                                       | 44 (66.7%)                                         | 41 (61.2%)          | 44 (66.7%)          | 151 (74.4%)         | 479 (70.4%)    |
| ≥ 12 s                                            | 117 (33.9%)                                       | 84 (25.1%)          | 69 (33.0%)                                        | 22 (33.3%)                                         | 26 (38.8%)          | 22 (33.3%)          | 52 (25.6%)          | 201 (29.6%)    |
| Mean ± SD                                         | 12.1 ± 5.9                                        | 11.1 ± 4.6          | 12.1 ± 6.6                                        | 12.6 ± 6.9                                         | 12.5 ± 5.2          | 11.9 ± 3.9          | 11.2 ± 3.9          | 11.6 ± 5.3     |
| No. missing                                       | 4                                                 | 4                   | 3                                                 | 1                                                  | 0                   | 1                   | 2                   | 8              |
| 6 minute walk <sup>g</sup>                        |                                                   |                     |                                                   |                                                    |                     |                     |                     |                |
| No. not starting walk                             | 43                                                | 28                  | 31                                                | 9                                                  | 6                   | 6                   | 14                  | 71             |
| Those starting walk                               |                                                   |                     |                                                   |                                                    |                     |                     |                     |                |
| No.                                               | 306                                               | 311                 | 181                                               | 58                                                 | 61                  | 61                  | 191                 | 617            |
| Distance (m), mean ± SD                           | 307 ± 89                                          | 322 ± 90            | 310 ± 81                                          | 305 ± 85                                           | 294 ± 87            | 308 ± 111           | 316 ± 88            | 315 ± 90       |
| Those walking 6 minutes                           |                                                   |                     |                                                   |                                                    |                     |                     |                     |                |
| No. (% of those starting)                         | 295 (96.4%)                                       | 300 (96.5%)         | 177 (97.8%)                                       | 55 (94.8%)                                         | 58 (95.1%)          | 57 (93.4%)          | 183 (95.8%)         | 595 (96.4%)    |
| Distance (m), mean ± SD                           | 313 ± 82                                          | 330 ± 81            | 313 ± 76                                          | 310 ± 77                                           | 298 ± 87            | 324 ± 94            | 325 ± 78            | 321 ± 82       |

|                                 | Primary Analysis Population<br>(N=688)            |                     | Those<br>randomized<br>to 1000<br>IU/d<br>(N=212) | 4-Dose Analysis Population <sup>b</sup><br>(N=406) |                     |                     |                     | All<br>(N=688) |
|---------------------------------|---------------------------------------------------|---------------------|---------------------------------------------------|----------------------------------------------------|---------------------|---------------------|---------------------|----------------|
|                                 | Pooled<br>Higher<br>Doses <sup>a</sup><br>(N=349) | 200 IU/d<br>(N=339) |                                                   | 1000 IU/d<br>(N=67)                                | 2000 IU/d<br>(N=67) | 4000 IU/d<br>(N=67) | 200 IU/d<br>(N=205) |                |
| Grip strength (kg) <sup>h</sup> |                                                   |                     |                                                   |                                                    |                     |                     |                     |                |
| Females, no. in dose group      | 159                                               | 141                 | 102                                               | 29                                                 | 29                  | 27                  | 88                  | 300            |
| Mean ± SD                       | 18.9 ± 5.8                                        | 18.1 ± 6.5          | 18.6 ± 6.0                                        | 19.2 ± 4.6                                         | 19.8 ± 5.5          | 19.0 ± 5.5          | 19.4 ± 5.8          | 18.5 ± 6.2     |
| No. missing                     | 7                                                 | 3                   | 7                                                 | 1                                                  | 0                   | 0                   | 3                   | 10             |
| Males, no. in dose group        | 190                                               | 198                 | 110                                               | 38                                                 | 38                  | 40                  | 117                 | 388            |
| Mean ± SD                       | 29.2 ± 9.6                                        | 30.6 ± 9.0          | 27.9 ± 9.4                                        | 30.7 ± 8.8                                         | 31.8 ± 10.2         | 30.4 ± 9.3          | 30.9 ± 8.9          | 29.9 ± 9.3     |
| No. missing                     | 2                                                 | 4                   | 1                                                 | 1                                                  | 1                   | 0                   | 0                   | 6              |

*Note.* IU/d = international units per day; SD = standard deviation; SPPB = Short Physical Performance Battery; TUG = Timed Up-and-Go test.

<sup>a</sup>Pooled Higher Doses denotes the combined 1000, 2000, and 4000 IU/d groups.

<sup>b</sup>The 4-dose analysis population includes all participants randomized prior to the first adaptation of the randomization probabilities.

<sup>c</sup>More than one race could be reported by a participant; race was self-reported.

<sup>d</sup>Physical activity level was considered low if <128 kcal/wk (males) or <90 kcal/wk (females).

<sup>e</sup>The Short Physical Performance Battery (SPPB) is a 3-part assessment of physical functioning: balance testing, timed 4-meter walk, and ability to stand up from a seated position in a chair; each part is scored 0 to 4 and the total SPPB score (range 0 to 12) is the sum of the 3 subscores. Higher scores indicate better physical function. The total balance stand time (range 0-30 seconds) combines the stand durations from the 3 balance tests. Gait speed was calculated as 4 meters divided by the duration of the walk in seconds. The chair stand test outcome is the time required to complete 5 chair stands and the test is terminated at 60 seconds if not completed by that time.

<sup>f</sup>The Timed Up-and-Go (TUG) test is a timed test of standing up from a chair, walking at normal pace for 3 meters, turning, returning to the chair, and sitting down; the test result is the time in seconds to complete all 5 parts. The test is terminated at 60 seconds if not completed by that time.

<sup>g</sup>The 6-minute walk is a test of endurance; the participant is instructed to walk at maximum pace for 6 minutes and the score is distance covered. Each site used a straight line course 10 meters in length; each end was marked with a cone which the participant had to walk around. Total distance walked was recorded for each participant who started the walk.

<sup>h</sup>Grip strength is the maximum of 3 tries with the dominant hand of a hand-held dynamometer; if the dominant hand could not be tested, results for the non-dominant hand were used.

**eTable 2. Serum 25(OH)D level (ng/mL) over time by treatment group and use of a personal vitamin D supplement at enrollment.**

|                                                                       |                          | <b>Enrollment</b> | <b>3 months</b> | <b>12 months</b>  | <b>24 months</b> |
|-----------------------------------------------------------------------|--------------------------|-------------------|-----------------|-------------------|------------------|
| <b>PHD</b>                                                            | Abs level, mean ± SD     | 22.1 ± 4.9        | 36.4 ± 10.7     | 38.8 ± 12.0       | 39.7 ± 11.9      |
|                                                                       | Chg from BL, mean ± SD   |                   | 14.3 ± 11.3     | 16.8 ± 12.3       | 18.0 ± 12.4      |
|                                                                       | No. in group             | 349               | 323             | 254               | 160              |
| <b>200 IU/d</b>                                                       | Abs level, mean ± SD     | 22.1 ± 5.3        | 27.0 ± 5.8      | 27.5 ± 6.7        | 28.2 ± 6.7       |
|                                                                       | Chg from BL, mean ± SD   |                   | 4.9 ± 5.7       | 5.5 ± 6.6         | 6.4 ± 6.9        |
|                                                                       | No. in group             | 339               | 314             | 261               | 168              |
| <b>PHD v. 200 IU/d</b>                                                | Diff betw means (95% CI) |                   | 9.4 (8.0, 10.8) | 11.4 (9.6, 13.1)  | 11.6 (9.4, 13.7) |
| <b><i>Not using a personal vitamin D supplement at enrollment</i></b> |                          |                   |                 |                   |                  |
| <b>PHD</b>                                                            | Abs level, mean ± SD     | 20.9 ± 5.1        | 36.6 ± 10.5     | 39.9 ± 13.2       | 39.8 ± 11.9      |
|                                                                       | Chg from BL, mean ± SD   |                   | 15.6 ± 11.4     | 19.0 ± 13.5       | 19.2 ± 12.3      |
|                                                                       | No. in group             | 217               | 199             | 158               | 101              |
| <b>200 IU/d</b>                                                       | Abs level, mean ± SD     | 20.4 ± 5.4        | 26.1 ± 5.6      | 26.8 ± 7.0        | 27.4 ± 7.0       |
|                                                                       | Chg from BL, mean ± SD   |                   | 5.7 ± 5.9       | 6.6 ± 7.1         | 7.5 ± 7.1        |
|                                                                       | No. in group             | 215               | 199             | 166               | 105              |
| <b>PHD v. 200 IU/d</b>                                                | Diff betw means (95% CI) |                   | 9.9 (8.1, 11.7) | 12.4 (10.0, 14.7) | 11.6 (8.9, 14.4) |
| <b><i>Using a personal vitamin D supplement at enrollment</i></b>     |                          |                   |                 |                   |                  |
| <b>PHD</b>                                                            | Abs level, mean ± SD     | 24.0 ± 4.0        | 36.2 ± 11.0     | 36.9 ± 9.3        | 39.6 ± 12.1      |
|                                                                       | Chg from BL, mean ± SD   |                   | 12.2 ± 10.9     | 13.3 ± 9.1        | 15.9 ± 12.4      |
|                                                                       | No. in group             | 132               | 124             | 96                | 59               |
| <b>200 IU/d</b>                                                       | Abs level, mean ± SD     | 25.3 ± 3.2        | 28.5 ± 5.7      | 28.6 ± 5.8        | 29.5 ± 5.9       |
|                                                                       | Chg from BL, mean ± SD   |                   | 3.4 ± 5.0       | 3.6 ± 5.1         | 4.5 ± 6.1        |
|                                                                       | No. in group             | 124               | 115             | 95                | 63               |
| <b>PHD v. 200 IU/d</b>                                                | Diff betw means (95% CI) |                   | 8.8 (6.6, 11.0) | 9.8 (7.6, 11.9)   | 11.4 (7.9, 14.8) |

Abbreviations: BL = baseline; CI = confidence interval; IU/d = international units per day; PHD = Pooled Higher Doses. Note: Pooled Higher Doses denotes the combined 1000, 2000, and 4000 IU/d groups.

**eTable 3. Change in 6-minute walk and grip strength since randomization in the primary analysis population.**

|                                                                         | 3 months                         |            | 12 months                        |            | 24 months                        |            | P, interaction <sup>b</sup> |                             |
|-------------------------------------------------------------------------|----------------------------------|------------|----------------------------------|------------|----------------------------------|------------|-----------------------------|-----------------------------|
|                                                                         | Pooled Higher Doses <sup>a</sup> | 200 IU/d   | Pooled Higher Doses <sup>a</sup> | 200 IU/d   | Pooled Higher Doses <sup>a</sup> | 200 IU/d   | Unadj                       | Adj (significant if < 0.11) |
| <b>6 minute walk distance (all who started the walk; m)<sup>c</sup></b> |                                  |            |                                  |            |                                  |            |                             |                             |
| No. of participants in analysis                                         | 253                              | 260        | 190                              | 207        | 115                              | 129        |                             |                             |
| BL, mean ± SD <sup>d</sup>                                              | 317 ± 82                         | 330 ± 89   | 325 ± 84                         | 332 ± 85   | 327 ± 82                         | 346 ± 79   |                             |                             |
| Change (FU-BL), mean ± SD                                               | 6 ± 46                           | 5 ± 48     | -4 ± 56                          | -8 ± 54    | -9 ± 67                          | -14 ± 49   |                             |                             |
| P, change within group <sup>e</sup>                                     | 0.05                             | 0.12       | 0.32                             | 0.04       | 0.15                             | 0.002      |                             |                             |
| P, difference between groups <sup>b</sup>                               | 0.66                             |            | 0.27                             |            | 0.72                             |            | 0.75                        | 0.91                        |
| <b>6 minute walk distance (those who walked 6 min) (m)<sup>c</sup></b>  |                                  |            |                                  |            |                                  |            |                             |                             |
| No. of participants in analysis                                         | 243                              | 245        | 180                              | 194        | 110                              | 127        |                             |                             |
| BL, mean ± SD <sup>d</sup>                                              | 322 ± 77                         | 339 ± 80   | 331 ± 77                         | 340 ± 77   | 333 ± 76                         | 350 ± 73   |                             |                             |
| Change (FU-BL), mean ± SD                                               | 5 ± 45                           | 6 ± 45     | -4 ± 50                          | -4 ± 45    | -8 ± 62                          | -14 ± 49   |                             |                             |
| P, change within group <sup>e</sup>                                     | 0.07                             | 0.06       | 0.31                             | 0.23       | 0.18                             | 0.002      |                             |                             |
| P, difference between groups <sup>b</sup>                               | >0.99                            |            | 0.42                             |            | 0.62                             |            | 0.82                        | 0.91                        |
| <b>Grip strength (kg), females<sup>f</sup></b>                          |                                  |            |                                  |            |                                  |            |                             |                             |
| No. of participants in analysis                                         | 131                              | 122        | 94                               | 99         | 61                               | 63         |                             |                             |
| BL, mean ± SD <sup>d</sup>                                              | 19.3 ± 5.7                       | 18.6 ± 6.5 | 19.2 ± 5.7                       | 19.3 ± 6.1 | 19.9 ± 5.4                       | 20.0 ± 6.0 |                             |                             |
| Change (FU-BL), mean ± SD                                               | -0.5 ± 4.1                       | -1.0 ± 5.3 | -1.4 ± 4.3                       | -1.3 ± 5.0 | -2.0 ± 5.0                       | -2.2 ± 5.3 |                             |                             |
| P, change within group <sup>e</sup>                                     | 0.13                             | 0.03       | 0.002                            | 0.008      | 0.002                            | 0.002      |                             |                             |
| P, difference between groups <sup>b</sup>                               | 0.54                             |            | 0.57                             |            | 0.77                             |            | 0.72                        | 0.91                        |
| <b>Grip strength (kg), males<sup>f</sup></b>                            |                                  |            |                                  |            |                                  |            |                             |                             |
| No. of participants in analysis                                         | 176                              | 177        | 142                              | 143        | 89                               | 96         |                             |                             |
| BL, mean ± SD <sup>d</sup>                                              | 29.7 ± 9.5                       | 30.9 ± 9.1 | 30.3 ± 9.7                       | 31.3 ± 9.0 | 32.3 ± 9.3                       | 31.9 ± 8.8 |                             |                             |
| Change (FU-BL), mean ± SD                                               | -0.5 ± 6.2                       | -0.2 ± 5.2 | -2.0 ± 6.9                       | -1.3 ± 7.0 | -2.1 ± 5.7                       | -2.8 ± 4.8 |                             |                             |
| P, change within group <sup>e</sup>                                     | 0.33                             | 0.65       | 0.001                            | 0.03       | 0.001                            | <0.001     |                             |                             |
| P, difference between groups <sup>b</sup>                               | 0.63                             |            | 0.33                             |            | 0.40                             |            | 0.42                        | 0.81                        |

Note. BL = baseline; FU = follow-up; IU/d = international units per day; SD = standard deviation.

<sup>a</sup>Pooled Higher Doses denotes the combined 1000, 2000, and 4000 IU/d groups.

<sup>b</sup>A longitudinal mixed effects linear regression model with fixed effects including a single term for treatment, 3 time point terms, and 3 treatment-by-time interaction terms and a random intercept for participant was fit for each outcome; this model included all available measures of the outcome for all participants, including those with only a baseline measure. Each time-specific P value for difference between dose groups is derived from the corresponding treatment-by-time interaction term. The interaction P test for overall difference between groups in differential change from baseline is from a 3-degree of

freedom test of the combined 3 treatment-by-time interaction terms from the longitudinal model. The Benjamini-Hochberg procedure was used to control the false discovery rate to less than 1/9 (1 out of the maximum number of overall comparisons in each family of analyses (table or figure) comparing dose groups; an adjusted P value is statistically significant if  $<0.11$ ).

<sup>c</sup>The 6-minute walk is a test of endurance; the participant is instructed to walk at maximum pace for 6 minutes and the score is distance covered. Each site used a straight line course 10 meters in length; each end was marked with a cone which the participant had to walk around. Total distance walked was recorded for each participant who started the walk.

<sup>d</sup>Baseline values are shown for those with a follow-up measure at the given time point.

<sup>e</sup>P values for time-specific change within group were derived from t-tests.

<sup>f</sup>Grip strength is the maximum of 3 tries with the dominant hand of a hand-held dynamometer; if the dominant hand could not be tested, results for the non-dominant hand were used.



**eTable 4. Sensitivity analysis: Change in functional outcome measures since randomization in those randomized to 1000 IU/d versus those randomized to 200 IU/d.**

|                                                      | 3 months     |              | 12 months    |              | 24 months    |              | P, interaction <sup>a</sup><br>Adj<br>(significant if<br><0.11) |      |
|------------------------------------------------------|--------------|--------------|--------------|--------------|--------------|--------------|-----------------------------------------------------------------|------|
|                                                      | 1000 IU/d    | 200 IU/d     | 1000 IU/d    | 200 IU/d     | 1000 IU/d    | 200 IU/d     | Unadj                                                           | Adj  |
| <b>SPPB score<sup>b</sup></b>                        |              |              |              |              |              |              |                                                                 |      |
| No. in analysis                                      | 196          | 314          | 135          | 260          | 58           | 171          |                                                                 |      |
| BL, mean ± SD <sup>c</sup>                           | 8.8 ± 2.5    | 8.9 ± 2.3    | 8.9 ± 2.4    | 9.0 ± 2.2    | 8.6 ± 2.5    | 9.0 ± 2.2    |                                                                 |      |
| Chg (FU-BL), mean ± SD                               | -0.2 ± 1.6   | 0.0 ± 1.9    | -0.3 ± 2.0   | -0.2 ± 1.9   | -0.5 ± 2.5   | -0.8 ± 2.5   |                                                                 |      |
| P, chg within group <sup>d</sup>                     | 0.12         | 0.88         | 0.05         | 0.06         | 0.15         | <0.001       |                                                                 |      |
| P, difference between groups <sup>a</sup>            |              | 0.46         |              | 0.53         |              | 0.73         | 0.76                                                            | 0.76 |
| <b>Total SPPB balance stand time (s)<sup>b</sup></b> |              |              |              |              |              |              |                                                                 |      |
| No. in analysis                                      | 196          | 313          | 135          | 259          | 58           | 170          |                                                                 |      |
| BL, mean ± SD <sup>c</sup>                           | 26.9 ± 6.3   | 26.9 ± 6.3   | 27.5 ± 5.4   | 27.3 ± 5.9   | 27.3 ± 6.6   | 26.7 ± 6.8   |                                                                 |      |
| Chg (FU-BL), mean ± SD                               | 0.4 ± 5.5    | 0.1 ± 6.3    | -0.7 ± 6.1   | 0.1 ± 6.0    | -2.4 ± 7.7   | -1.3 ± 9.0   |                                                                 |      |
| P, chg within group <sup>d</sup>                     | 0.27         | 0.77         | 0.16         | 0.84         | 0.02         | 0.07         |                                                                 |      |
| P, difference between groups <sup>a</sup>            |              | 0.47         |              | 0.50         |              | 0.52         | 0.52                                                            | 0.76 |
| <b>SPPB gait speed (m/s)<sup>b</sup></b>             |              |              |              |              |              |              |                                                                 |      |
| No. in analysis                                      | 194          | 309          | 131          | 258          | 55           | 162          |                                                                 |      |
| BL, mean ± SD <sup>c</sup>                           | 0.85 ± 0.24  | 0.89 ± 0.23  | 0.88 ± 0.24  | 0.90 ± 0.24  | 0.85 ± 0.27  | 0.93 ± 0.23  |                                                                 |      |
| Chg (FU-BL), mean ± SD                               | -0.03 ± 0.17 | -0.01 ± 0.18 | -0.04 ± 0.18 | -0.04 ± 0.20 | -0.01 ± 0.17 | -0.09 ± 0.21 |                                                                 |      |
| P, chg within group <sup>d</sup>                     | 0.03         | 0.58         | 0.02         | 0.001        | 0.61         | <0.001       |                                                                 |      |
| P, difference between groups <sup>a</sup>            |              | 0.27         |              | 0.80         |              | 0.07         | 0.09                                                            | 0.45 |
| <b>SPPB chair stands time (s)<sup>b</sup></b>        |              |              |              |              |              |              |                                                                 |      |
| No. in analysis                                      | 167          | 276          | 109          | 219          | 43           | 128          |                                                                 |      |
| BL, mean ± SD <sup>c</sup>                           | 14.5 ± 4.3   | 15.1 ± 4.9   | 14.8 ± 4.5   | 15.1 ± 4.6   | 15.2 ± 4.1   | 14.8 ± 4.2   |                                                                 |      |
| Chg (FU-BL), mean ± SD                               | 0.0 ± 4.0    | -0.2 ± 4.4   | -0.9 ± 4.8   | -0.3 ± 4.6   | -1.6 ± 4.3   | -0.6 ± 3.6   |                                                                 |      |
| P, chg within group <sup>d</sup>                     | 0.93         | 0.38         | 0.07         | 0.30         | 0.02         | 0.05         |                                                                 |      |
| P, difference between groups <sup>a</sup>            |              | 0.73         |              | 0.42         |              | 0.68         | 0.72                                                            | 0.76 |
| <b>TUG time (s)<sup>e</sup></b>                      |              |              |              |              |              |              |                                                                 |      |
| No. in analysis                                      | 191          | 305          | 128          | 255          | 52           | 159          |                                                                 |      |
| BL, mean ± SD <sup>c</sup>                           | 11.9 ± 6.7   | 11.0 ± 4.6   | 11.1 ± 5.1   | 10.8 ± 3.5   | 11.3 ± 4.7   | 10.4 ± 3.0   |                                                                 |      |
| Chg (FU-BL), mean ± SD                               | -0.2 ± 2.7   | 0.3 ± 4.0    | 0.3 ± 2.5    | 0.5 ± 2.3    | 0.4 ± 2.5    | 1.1 ± 2.5    |                                                                 |      |
| P, chg within group <sup>d</sup>                     | 0.29         | 0.15         | 0.12         | 0.001        | 0.28         | <0.001       |                                                                 |      |
| P, difference between groups <sup>a</sup>            |              | 0.04         |              | 0.24         |              | 0.07         | 0.13                                                            | 0.45 |

|                                                                         | 3 months   |            | 12 months  |            | 24 months  |            | P, interaction <sup>a</sup><br>Adj<br>(significant if<br><0.11) |      |
|-------------------------------------------------------------------------|------------|------------|------------|------------|------------|------------|-----------------------------------------------------------------|------|
|                                                                         | 1000 IU/d  | 200 IU/d   | 1000 IU/d  | 200 IU/d   | 1000 IU/d  | 200 IU/d   | Unadj                                                           | Adj  |
| <b>6 minute walk distance (all who started the walk; m)<sup>f</sup></b> |            |            |            |            |            |            |                                                                 |      |
| No. in analysis                                                         | 146        | 260        | 101        | 207        | 40         | 129        |                                                                 |      |
| BL, mean ± SD <sup>c</sup>                                              | 319 ± 73   | 330 ± 89   | 329 ± 73   | 332 ± 85   | 325 ± 81   | 346 ± 79   |                                                                 |      |
| Chg (FU-BL), mean ± SD                                                  | 7 ± 47     | 5 ± 48     | 0 ± 60     | -8 ± 54    | 9 ± 57     | -14 ± 49   |                                                                 |      |
| P, chg within group <sup>d</sup>                                        | 0.09       | 0.12       | 0.98       | 0.04       | 0.35       | 0.002      |                                                                 |      |
| P, difference between groups <sup>a</sup>                               | 0.63       |            | 0.11       |            | 0.07       |            | 0.20                                                            | 0.45 |
| <b>6 minute walk distance (those who walked 6 min) (m)<sup>f</sup></b>  |            |            |            |            |            |            |                                                                 |      |
| No. in analysis                                                         | 141        | 245        | 96         | 194        | 39         | 127        |                                                                 |      |
| BL, mean ± SD <sup>c</sup>                                              | 323 ± 67   | 339 ± 80   | 333 ± 63   | 340 ± 77   | 332 ± 69   | 350 ± 73   |                                                                 |      |
| Chg (FU-BL), mean ± SD                                                  | 6 ± 45     | 6 ± 45     | 0 ± 50     | -4 ± 45    | 5 ± 52     | -14 ± 49   |                                                                 |      |
| P, chg within group <sup>d</sup>                                        | 0.13       | 0.06       | 0.99       | 0.23       | 0.58       | 0.002      |                                                                 |      |
| P, difference between groups <sup>a</sup>                               | 0.89       |            | 0.13       |            | 0.09       |            | 0.20                                                            | 0.45 |
| <b>Grip strength (kg), females<sup>g</sup></b>                          |            |            |            |            |            |            |                                                                 |      |
| No. in analysis                                                         | 81         | 122        | 55         | 99         | 23         | 63         |                                                                 |      |
| BL, mean ± SD <sup>c</sup>                                              | 19.3 ± 5.7 | 18.6 ± 6.5 | 18.7 ± 6.0 | 19.3 ± 6.1 | 20.2 ± 5.0 | 20.0 ± 6.0 |                                                                 |      |
| Chg (FU-BL), mean ± SD                                                  | -0.2 ± 4.2 | -1.0 ± 5.3 | -1.1 ± 4.7 | -1.3 ± 5.0 | -1.9 ± 5.8 | -2.2 ± 5.3 |                                                                 |      |
| P, chg within group <sup>d</sup>                                        | 0.67       | 0.03       | 0.09       | 0.008      | 0.14       | 0.002      |                                                                 |      |
| P, difference between groups <sup>a</sup>                               | 0.26       |            | 0.89       |            | 0.63       |            | 0.61                                                            | 0.76 |
| <b>Grip strength (kg), males<sup>g</sup></b>                            |            |            |            |            |            |            |                                                                 |      |
| No. in analysis                                                         | 99         | 177        | 70         | 143        | 31         | 96         |                                                                 |      |
| BL, mean ± SD <sup>c</sup>                                              | 28.6 ± 9.2 | 30.9 ± 9.1 | 29.5 ± 9.7 | 31.3 ± 9.0 | 33.0 ± 8.0 | 31.9 ± 8.8 |                                                                 |      |
| Chg (FU-BL), mean ± SD                                                  | -0.6 ± 6.4 | -0.2 ± 5.2 | -1.4 ± 7.6 | -1.3 ± 7.0 | -2.1 ± 5.0 | -2.8 ± 4.8 |                                                                 |      |
| P, chg within group <sup>d</sup>                                        | 0.34       | 0.65       | 0.13       | 0.03       | 0.03       | <0.001     |                                                                 |      |
| P, difference between groups <sup>a</sup>                               | 0.51       |            | 0.92       |            | 0.38       |            | 0.61                                                            | 0.76 |

Abbreviations: BL = baseline, CI = confidence interval, FU = follow-up, IU/d = international units per day; SD = standard deviation.

<sup>a</sup>A longitudinal mixed effects linear regression model with fixed effects including a single term for treatment, 3 time point terms, and 3 treatment-by-time interaction terms and a random intercept for participant was fit for each outcome; this model included all available measures of the outcome for all participants, including those with only a baseline measure. Each time-specific P value for difference between dose groups is derived from the corresponding treatment-by-time interaction term. The interaction P test for overall difference between groups in differential change from baseline is from a 3-degree of freedom test of the combined 3 treatment-by-time interaction terms from the longitudinal model. The Benjamini-Hochberg procedure was used to control

the false discovery rate to less than 1/9 (1 out of the maximum number of overall comparisons in each family of analyses (table or figure) comparing dose groups; an adjusted P value is statistically significant if  $<0.11$ .

<sup>b</sup>The Short Physical Performance Battery (SPPB) is a 3-part assessment of physical functioning: balance testing, timed 4-meter walk, and ability to stand up from a seated position in a chair; each part is scored 0 to 4 and the total SPPB score (range 0 to 12) is the sum of the 3 subscores. Higher scores indicate better physical function. The total balance stand time (range 0-30 s) combines the stand durations from the 3 balance tests. Gait speed was calculated as 4 meters divided by the duration of the walk in seconds. The chair stand test outcome is the time required to complete 5 chair stands and the test is terminated if not completed in 60 seconds or less.

<sup>c</sup>Baseline values are shown for those with a follow-up measure at the given time point.

<sup>d</sup>P values for time-specific change within group were derived from t-tests.

<sup>e</sup>The Timed Up and Go (TUG) test is a timed test of standing up from a chair, walking at normal pace for 3 meters, turning, returning to the chair, and sitting down; the test result is the time in seconds to complete all 5 parts. The test is terminated at 60 seconds if not complete by that time.

<sup>f</sup>The 6-minute walk is a test of endurance; the participant is instructed to walk at maximum pace for 6 minutes and the score is distance covered. Each site used a straight line course 10 meters in length; each end was marked with a cone which the participant had to walk around. Total distance walked was recorded for each participant who started the walk.

<sup>g</sup>Grip strength is the maximum of 3 tries with the dominant hand of a hand-held dynamometer; if the dominant hand could not be tested, results for the non dominant hand were used.

**eTable 5. Exploratory analysis: Change in functional outcome measures since randomization in the 4-group analysis population (those randomized before any adaptation of the randomization probabilities)<sup>a</sup>**

|                                                      | 3 months    |             |             |             | 12 months   |              |              |              | 24 months   |              |              |              | P, interaction <sup>b</sup><br>Adj<br>(signif.<br>if <0.11) |           |
|------------------------------------------------------|-------------|-------------|-------------|-------------|-------------|--------------|--------------|--------------|-------------|--------------|--------------|--------------|-------------------------------------------------------------|-----------|
|                                                      | 1000 IU/d   | 2000 IU/d   | 4000 IU/d   | 200 IU/d    | 1000 IU/d   | 2000 IU/d    | 4000 IU/d    | 200 IU/d     | 1000 IU/d   | 2000 IU/d    | 4000 IU/d    | 200 IU/d     | Unadj                                                       | if <0.11) |
| <b>SPPB score<sup>c</sup></b>                        |             |             |             |             |             |              |              |              |             |              |              |              |                                                             |           |
| No. in analysis                                      | 64          | 63          | 62          | 193         | 57          | 49           | 45           | 182          | 50          | 11           | 14           | 152          |                                                             |           |
| BL, mean ± SD <sup>d</sup>                           | 8.4 ± 2.5   | 8.1 ± 2.4   | 8.7 ± 2.3   | 8.8 ± 2.3   | 8.4 ± 2.5   | 8.2 ± 2.3    | 8.6 ± 2.2    | 8.8 ± 2.2    | 8.4 ± 2.6   | 8.8 ± 1.9    | 9.1 ± 1.5    | 9.0 ± 2.3    |                                                             |           |
| Chg (FU-BL), mean ± SD                               | 0.1 ± 1.7   | 0.1 ± 2.0   | -0.1 ± 1.9  | 0.1 ± 1.9   | 0.4 ± 1.7   | 0.0 ± 1.9    | 0.0 ± 2.3    | -0.1 ± 1.9   | -0.4 ± 2.6  | -0.3 ± 2.1   | -0.7 ± 1.5   | -0.7 ± 2.3   |                                                             |           |
| P, chg within group <sup>e</sup>                     | 0.72        | 0.58        | 0.68        | 0.49        | 0.11        | 0.94         | 0.95         | 0.59         | 0.30        | 0.68         | 0.11         | <0.001       |                                                             |           |
| P, v. 200 IU/d <sup>b</sup>                          | 0.33        | 0.92        | 0.94        | --          | 0.13        | 0.14         | 0.99         | --           | 0.47        | 0.50         | 0.32         | --           | 0.84                                                        | 0.93      |
| <b>Total SPPB balance stand time (s)<sup>c</sup></b> |             |             |             |             |             |              |              |              |             |              |              |              |                                                             |           |
| No. in analysis                                      | 64          | 63          | 62          | 192         | 57          | 49           | 45           | 181          | 50          | 11           | 14           | 151          |                                                             |           |
| BL, mean ± SD <sup>d</sup>                           | 26.9 ± 6.5  | 26.1 ± 6.1  | 27.1 ± 5.1  | 26.4 ± 6.8  | 27.1 ± 6.7  | 26.5 ± 5.2   | 26.7 ± 5.4   | 26.9 ± 6.4   | 27.1 ± 7.0  | 26.9 ± 3.8   | 25.7 ± 6.4   | 26.6 ± 6.9   |                                                             |           |
| Chg (FU-BL), mean ± SD                               | -0.2 ± 5.6  | 1.2 ± 6.3   | -0.7 ± 4.2  | 0.5 ± 6.7   | -0.1 ± 5.1  | 1.2 ± 6.1    | -0.6 ± 7.7   | 0.3 ± 6.7    | -2.3 ± 8.1  | -1.9 ± 8.4   | -1.3 ± 6.7   | -0.8 ± 8.5   |                                                             |           |
| P, chg within group <sup>e</sup>                     | 0.81        | 0.14        | 0.22        | 0.27        | 0.90        | 0.17         | 0.61         | 0.60         | 0.05        | 0.46         | 0.49         | 0.22         |                                                             |           |
| P, v. 200 IU/d <sup>b</sup>                          | 0.56        | 0.47        | 0.50        | --          | 0.71        | 0.68         | 0.36         | --           | 0.49        | 0.16         | 0.51         | --           | 0.67                                                        | 0.93      |
| <b>SPPB gait speed (m/s)<sup>c</sup></b>             |             |             |             |             |             |              |              |              |             |              |              |              |                                                             |           |
| No. in analysis                                      | 63          | 62          | 61          | 191         | 56          | 47           | 43           | 180          | 47          | 11           | 14           | 146          |                                                             |           |
| BL, mean ± SD <sup>d</sup>                           | 0.81 ± 0.25 | 0.80 ± 0.23 | 0.87 ± 0.22 | 0.88 ± 0.21 | 0.81 ± 0.25 | 0.81 ± 0.23  | 0.86 ± 0.22  | 0.88 ± 0.22  | 0.82 ± 0.26 | 0.87 ± 0.17  | 0.91 ± 0.14  | 0.92 ± 0.21  |                                                             |           |
| Chg (FU-BL), mean ± SD                               | 0.01 ± 0.16 | 0.00 ± 0.16 | 0.03 ± 0.19 | 0.00 ± 0.17 | 0.03 ± 0.18 | -0.03 ± 0.13 | -0.03 ± 0.16 | -0.02 ± 0.20 | 0.00 ± 0.17 | -0.01 ± 0.13 | -0.02 ± 0.11 | -0.08 ± 0.20 |                                                             |           |
| P, chg within group <sup>e</sup>                     | 0.51        | 0.95        | 0.26        | 0.90        | 0.28        | 0.10         | 0.18         | 0.14         | 0.92        | 0.84         | 0.44         | <0.001       |                                                             |           |
| P, v. 200 IU/d <sup>b</sup>                          | 0.03        | 0.63        | 0.81        | --          | 0.01        | 0.09         | 0.85         | --           | 0.27        | 0.01         | 0.10         | --           | 0.05                                                        | 0.36      |
| <b>SPPB chair stands time (s)<sup>c</sup></b>        |             |             |             |             |             |              |              |              |             |              |              |              |                                                             |           |
| No. in analysis                                      | 54          | 52          | 53          | 173         | 49          | 40           | 39           | 155          | 37          | 10           | 13           | 115          |                                                             |           |
| BL, mean ± SD <sup>d</sup>                           | 15.8 ± 4.4  | 16.5 ± 4.5  | 16.8 ± 10.6 | 15.5 ± 5.1  | 15.6 ± 4.2  | 16.9 ± 4.6   | 18.1 ± 12.3  | 15.5 ± 4.9   | 15.4 ± 4.3  | 16.0 ± 3.8   | 14.3 ± 3.0   | 14.8 ± 4.3   |                                                             |           |
| Chg (FU-BL), mean ± SD                               | -0.9 ± 3.8  | -0.7 ± 5.1  | -2.2 ± 11.3 | -0.3 ± 4.7  | -2.0 ± 5.3  | -1.3 ± 4.3   | -4.4 ± 13.7  | -0.5 ± 4.9   | -1.8 ± 4.5  | -1.8 ± 5.3   | 0.9 ± 3.5    | -0.6 ± 3.7   |                                                             |           |
| P, chg within group <sup>e</sup>                     | 0.07        | 0.34        | 0.16        | 0.38        | 0.01        | 0.06         | 0.05         | 0.19         | 0.02        | 0.32         | 0.37         | 0.10         |                                                             |           |
| P, v. 200 IU/d <sup>b</sup>                          | 0.94        | 0.53        | 0.95        | --          | 0.02        | 0.11         | 0.40         | --           | 0.07        | 0.35         | 0.17         | --           | 0.08                                                        | 0.36      |
| <b>TUG time (s)<sup>f</sup></b>                      |             |             |             |             |             |              |              |              |             |              |              |              |                                                             |           |
| No. in analysis                                      | 63          | 61          | 60          | 189         | 55          | 47           | 40           | 180          | 44          | 11           | 13           | 144          |                                                             |           |
| BL, mean ± SD <sup>d</sup>                           | 12.6 ± 7.1  | 12.6 ± 5.4  | 11.2 ± 3.0  | 11.0 ± 3.8  | 12.2 ± 6.8  | 12.1 ± 4.2   | 11.2 ± 3.1   | 11.0 ± 3.6   | 11.6 ± 5.0  | 11.6 ± 1.9   | 10.8 ± 1.4   | 10.5 ± 3.0   |                                                             |           |
| Chg (FU-BL), mean ± SD                               | -0.6 ± 2.1  | -0.2 ± 2.8  | -0.4 ± 2.0  | 0.1 ± 2.7   | -0.5 ± 3.1  | 0.3 ± 2.9    | -0.3 ± 1.2   | 0.2 ± 2.4    | 0.2 ± 2.6   | 0.2 ± 2.1    | 0.8 ± 1.7    | 1.1 ± 2.5    |                                                             |           |
| P, chg within group <sup>e</sup>                     | 0.02        | 0.57        | 0.17        | 0.54        | 0.23        | 0.48         | 0.19         | 0.26         | 0.55        | 0.75         | 0.10         | <0.001       |                                                             |           |
| P, v. 200 IU/d <sup>b</sup>                          | 0.02        | 0.07        | 0.33        | --          | 0.06        | 0.06         | 0.92         | --           | 0.33        | 0.02         | 0.44         | --           | 0.39                                                        | 0.88      |

|                                                                   | 3 months   |             |            |            | 12 months  |             |            |            | 24 months  |             |            |            | P, interaction <sup>b</sup> |                        |
|-------------------------------------------------------------------|------------|-------------|------------|------------|------------|-------------|------------|------------|------------|-------------|------------|------------|-----------------------------|------------------------|
|                                                                   | 1000 IU/d  | 2000 IU/d   | 4000 IU/d  | 200 IU/d   | 1000 IU/d  | 2000 IU/d   | 4000 IU/d  | 200 IU/d   | 1000 IU/d  | 2000 IU/d   | 4000 IU/d  | 200 IU/d   | Unadj                       | Adj (signif. if <0.11) |
| <b>6 minute walk distance (all starting walk; m)<sup>g</sup></b>  |            |             |            |            |            |             |            |            |            |             |            |            |                             |                        |
| No. in analysis                                                   | 53         | 52          | 52         | 164        | 44         | 39          | 34         | 148        | 36         | 9           | 11         | 117        |                             |                        |
| BL, mean ± SD <sup>d</sup>                                        | 309 ± 83   | 295 ± 89    | 330 ± 94   | 322 ± 87   | 321 ± 76   | 303 ± 96    | 333 ± 98   | 327 ± 85   | 321 ± 82   | 334 ± 83    | 352 ± 65   | 344 ± 81   |                             |                        |
| Chg (FU-BL), mean ± SD                                            | 12 ± 50    | 6 ± 43      | 0 ± 47     | 6 ± 42     | 9 ± 61     | -11 ± 47    | -11 ± 56   | -10 ± 52   | 7 ± 58     | -23 ± 58    | -54 ± 84   | -11 ± 49   |                             |                        |
| P, chg within group <sup>e</sup>                                  | 0.08       | 0.30        | 0.98       | 0.08       | 0.31       | 0.16        | 0.28       | 0.03       | 0.50       | 0.26        | 0.06       | 0.01       |                             |                        |
| P, v. 200 IU/d <sup>b</sup>                                       | 0.33       | 0.26        | 0.73       | --         | 0.07       | 0.04        | 0.93       | --         | 0.92       | 0.08        | 0.71       | --         | 0.36                        | 0.88                   |
| <b>6 minute walk distance (all walking 6 min; (m)<sup>g</sup></b> |            |             |            |            |            |             |            |            |            |             |            |            |                             |                        |
| No. in analysis                                                   | 49         | 49          | 50         | 154        | 42         | 36          | 33         | 137        | 35         | 8           | 10         | 115        |                             |                        |
| BL, mean ± SD <sup>d</sup>                                        | 316 ± 73   | 298 ± 90    | 338 ± 87   | 331 ± 78   | 325 ± 64   | 310 ± 96    | 341 ± 88   | 338 ± 73   | 328 ± 70   | 347 ± 78    | 355 ± 68   | 348 ± 73   |                             |                        |
| Chg (FU-BL), mean ± SD                                            | 9 ± 45     | 6 ± 43      | 1 ± 47     | 6 ± 38     | 2 ± 48     | -9 ± 42     | -11 ± 57   | -7 ± 44    | 2 ± 53     | -10 ± 45    | -39 ± 71   | -11 ± 49   |                             |                        |
| P, chg within group <sup>e</sup>                                  | 0.15       | 0.32        | 0.91       | 0.07       | 0.78       | 0.22        | 0.29       | 0.06       | 0.80       | 0.55        | 0.11       | 0.02       |                             |                        |
| P, v. 200 IU/d <sup>b</sup>                                       | 0.30       | 0.55        | 0.85       | --         | 0.03       | 0.19        | 0.89       | --         | 0.54       | 0.21        | 0.83       | --         | 0.93                        | 0.93                   |
| <b>Grip strength (kg), females<sup>h</sup></b>                    |            |             |            |            |            |             |            |            |            |             |            |            |                             |                        |
| No. in analysis                                                   | 26         | 25          | 24         | 74         | 22         | 13          | 16         | 72         | 20         | 5           | 6          | 56         |                             |                        |
| BL, mean ± SD <sup>d</sup>                                        | 19.4 ± 4.7 | 19.4 ± 5.6  | 19.2 ± 5.8 | 19.8 ± 5.8 | 19.6 ± 4.5 | 20.6 ± 4.9  | 19.0 ± 5.6 | 19.7 ± 5.8 | 19.4 ± 4.7 | 20.4 ± 6.7  | 20.3 ± 5.6 | 19.7 ± 5.7 |                             |                        |
| Chg (FU-BL), mean ± SD                                            | 0.3 ± 3.4  | -1.4 ± 4.3  | -0.9 ± 3.6 | -1.2 ± 5.3 | -2.9 ± 4.6 | -1.6 ± 4.9  | -1.2 ± 2.7 | -1.5 ± 4.9 | -1.4 ± 6.0 | -0.8 ± 6.6  | -2.5 ± 6.7 | -2.1 ± 5.4 |                             |                        |
| P, chg within group <sup>e</sup>                                  | 0.65       | 0.11        | 0.24       | 0.05       | 0.008      | 0.26        | 0.09       | 0.01       | 0.33       | 0.80        | 0.40       | 0.006      |                             |                        |
| P, v. 200 IU/d <sup>b</sup>                                       | 0.95       | 0.21        | 0.66       | --         | 0.72       | 0.30        | 0.89       | --         | 0.85       | 0.61        | 0.68       | --         | 0.60                        | 0.93                   |
| <b>Grip strength (kg), males<sup>h</sup></b>                      |            |             |            |            |            |             |            |            |            |             |            |            |                             |                        |
| No. in analysis                                                   | 34         | 36          | 39         | 110        | 32         | 32          | 28         | 98         | 27         | 6           | 9          | 87         |                             |                        |
| BL, mean ± SD <sup>d</sup>                                        | 30.8 ± 8.5 | 31.8 ± 10.3 | 30.5 ± 9.4 | 31.0 ± 9.0 | 31.2 ± 8.4 | 32.1 ± 10.8 | 29.5 ± 8.6 | 31.5 ± 8.7 | 32.5 ± 8.4 | 38.7 ± 13.7 | 28.0 ± 8.4 | 31.7 ± 9.0 |                             |                        |
| Chg (FU-BL), mean ± SD                                            | -0.1 ± 3.7 | -0.9 ± 5.0  | 0.4 ± 6.9  | -0.5 ± 4.4 | -1.6 ± 6.7 | -3.1 ± 5.3  | -2.6 ± 7.8 | -2.3 ± 6.3 | -2.0 ± 5.0 | -3.0 ± 5.9  | -3.3 ± 3.9 | -3.1 ± 4.9 |                             |                        |
| P, chg within group <sup>e</sup>                                  | 0.89       | 0.28        | 0.73       | 0.27       | 0.20       | 0.002       | 0.09       | 0.001      | 0.05       | 0.27        | 0.03       | <0.001     |                             |                        |
| P, v. 200 IU/d <sup>b</sup>                                       | 0.94       | 0.79        | 0.65       | --         | 0.69       | 0.46        | 0.56       | --         | 0.76       | 0.30        | 0.82       | --         | 0.79                        | 0.93                   |

Abbreviations: BL = baseline, CI = confidence interval, FU = follow-up, IU/d = international units per day; SD = standard deviation.

<sup>a</sup>For those randomized to 2000 or 4000 IU/d and switched to 1000 IU/d, observation time is limited to time prior to switching.

<sup>b</sup>A longitudinal mixed effects linear regression model with fixed effects including 3 treatment terms, 3 time point terms, and 9 treatment-by-time interaction terms and a random intercept for participant was fit for each outcome; this model included all available measures of the outcome for all participants, including those with only a baseline measure. Each time-specific P value for difference between each higher dose group and control is derived from the corresponding treatment-by-time interaction term. The interaction P test for overall difference between groups in differential change from baseline is from a 9-degree of freedom test of the combined 9 treatment-by-time interaction terms from the longitudinal model. The Benjamini-Hochberg procedure was used to control the false discovery rate to less than 1/9 (1 out

of the maximum number of overall comparisons in each family of analyses (table or figure) comparing dose groups; an adjusted P value is statistically significant if  $<0.11$ .

<sup>c</sup>The Short Physical Performance Battery (SPPB) is a 3-part assessment of physical functioning: balance testing, timed 4-meter walk, and ability to stand up from a seated position in a chair; each part is scored 0 to 4 and the total SPPB score (range 0 to 12) is the sum of the 3 subscores. Higher scores indicate better physical function. The total balance stand time (range 0-30 s) combines the stand durations from the 3 balance tests. Gait speed was calculated as 4 meters divided by the duration of the walk in seconds. The chair stand test outcome is the time required to complete 5 chair stands and the test is terminated if not completed in 60 seconds or less.

<sup>d</sup>Baseline values are shown for those with a follow-up measure at the given time point.

<sup>e</sup>P values for time-specific change within group were derived from t-tests.

<sup>f</sup>The Timed Up and Go (TUG) test is a timed test of standing up from a chair, walking at normal pace for 3 meters, turning, returning to the chair, and sitting down; the test result is the time in seconds to complete all 5 parts. The test is terminated at 60 seconds if not complete by that time.

<sup>g</sup>The 6-minute walk is a test of endurance; the participant is instructed to walk at maximum pace for 6 minutes and the score is distance covered. Each site used a straight line course 10 meters in length; each end was marked with a cone which the participant had to walk around. Total distance walked was recorded for each participant who started the walk.

<sup>h</sup>Grip strength is the maximum of 3 tries with the dominant hand of a hand-held dynamometer; if the dominant hand could not be tested, results for the non dominant hand were used.
